# Supplementary material for: Role of stress-inducible protein-1 in recruitment of bone marrow derived cells into the ischemic brains
Source: PubMed Central journal article supplement (PMC3944463; doi:10.1002/emmm.201202258), 2013-07-08
Supplement: emmm0005-1227-SD2.pdf [file emmm0005-1227-SD2.pdf]

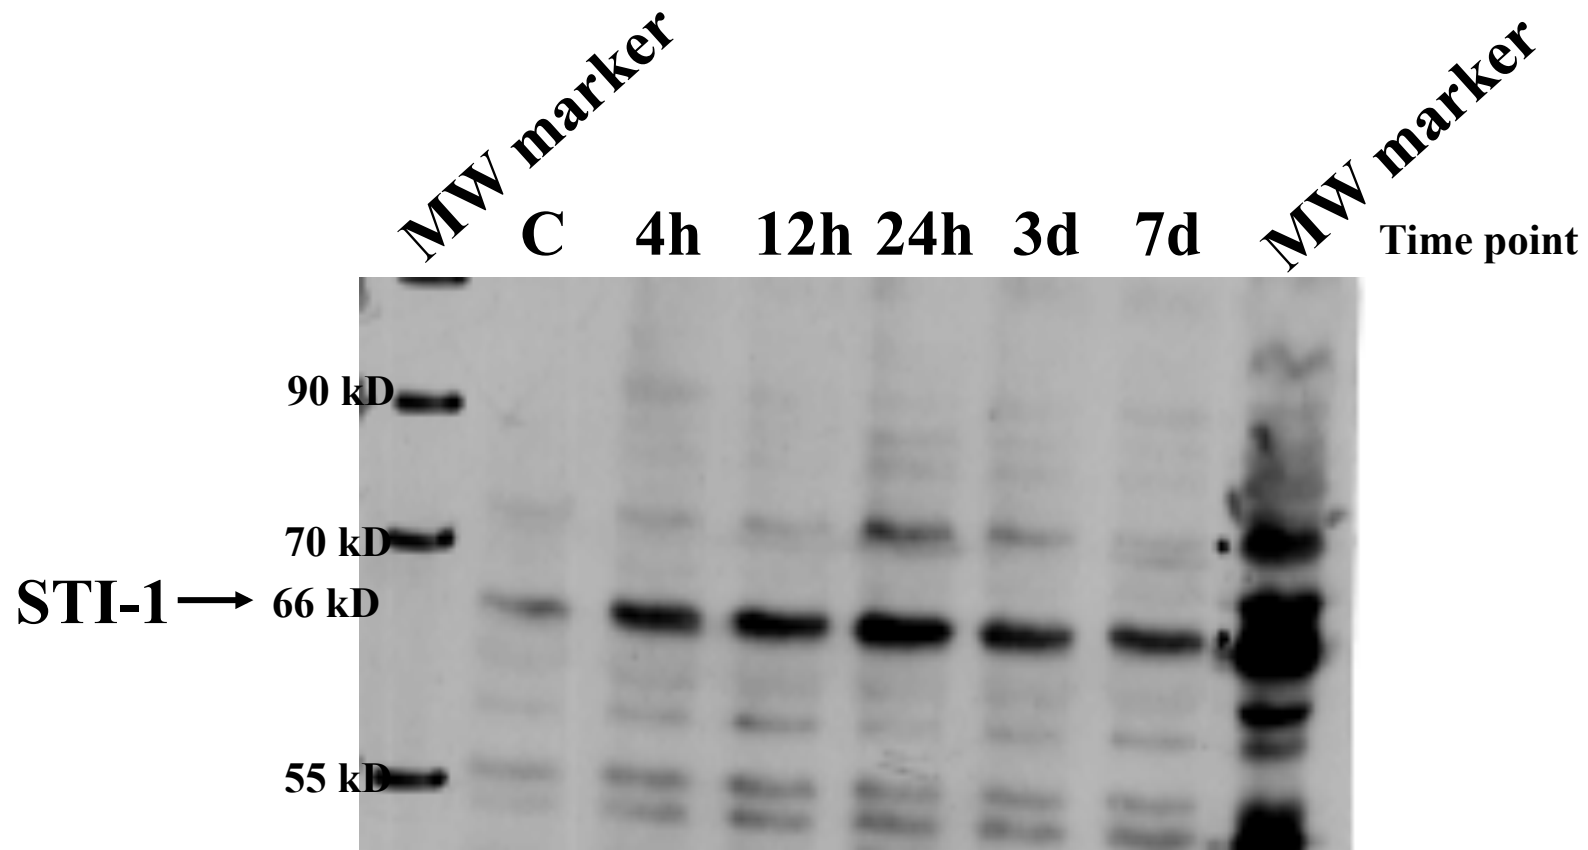

**Figure 1E**

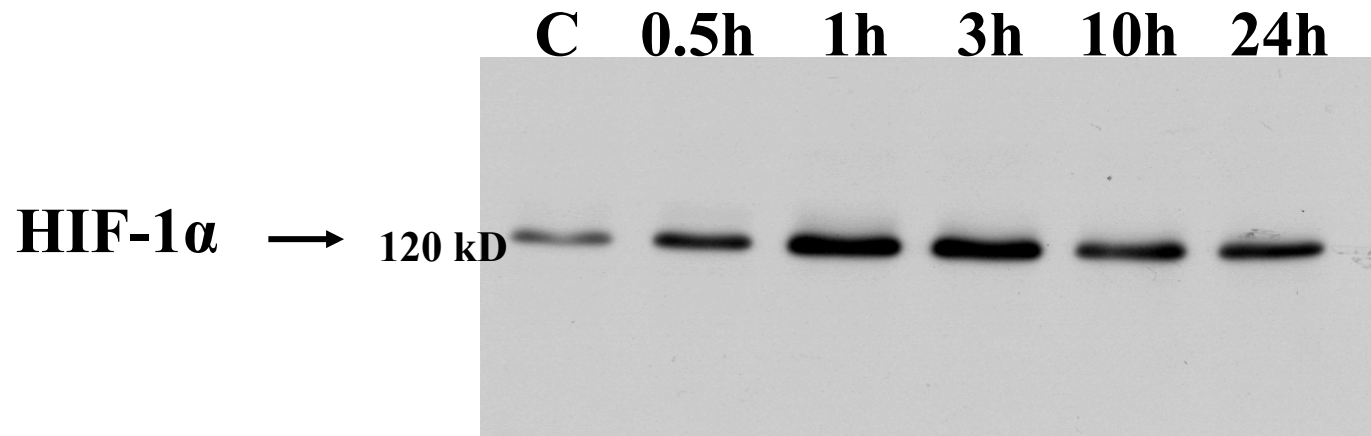

**Figure 2C**

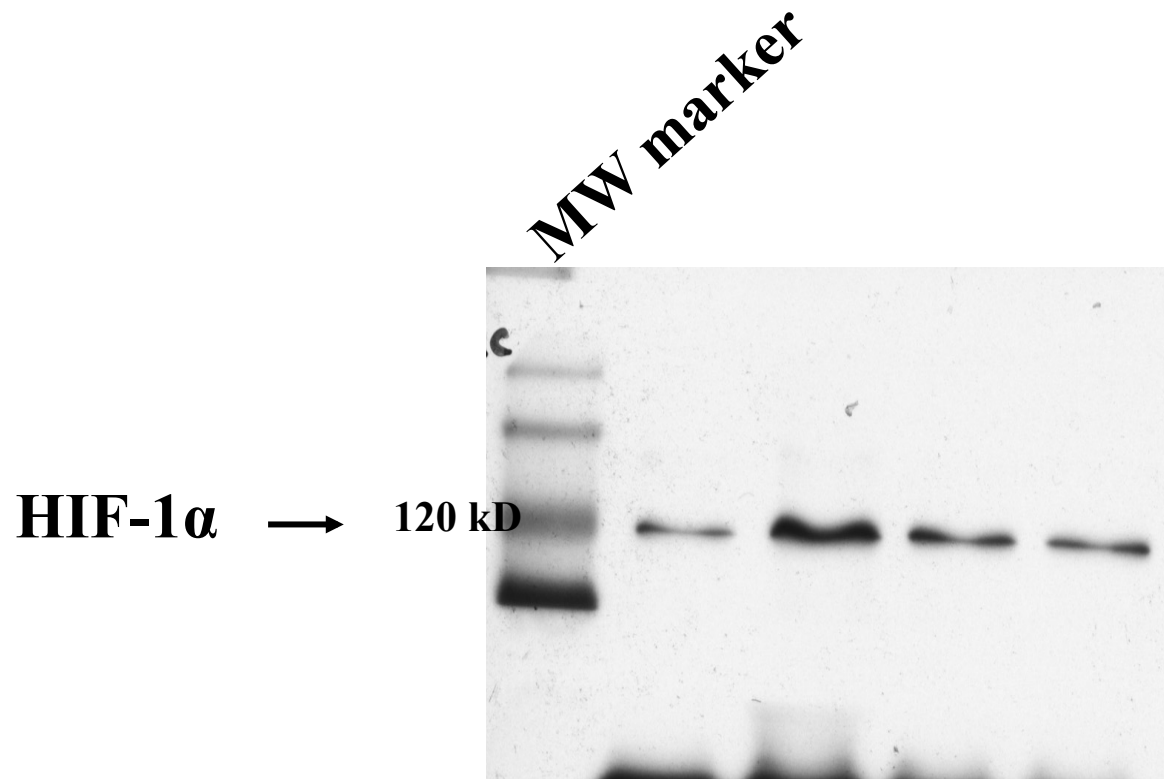

|                                               |   |   |   |   |
|-----------------------------------------------|---|---|---|---|
| <b>Hypoxia</b>                                | - | + | + | + |
| <b>2-ME2</b>                                  | - | - | + | - |
| <b>LV-HIF-1<math>\alpha</math><br/>-shRNA</b> | - | - | - | + |
| <b>LV-control<br/>-shRNA</b>                  | + | - | - | - |

**Figure 3C**

**STI-1** → 66 kD

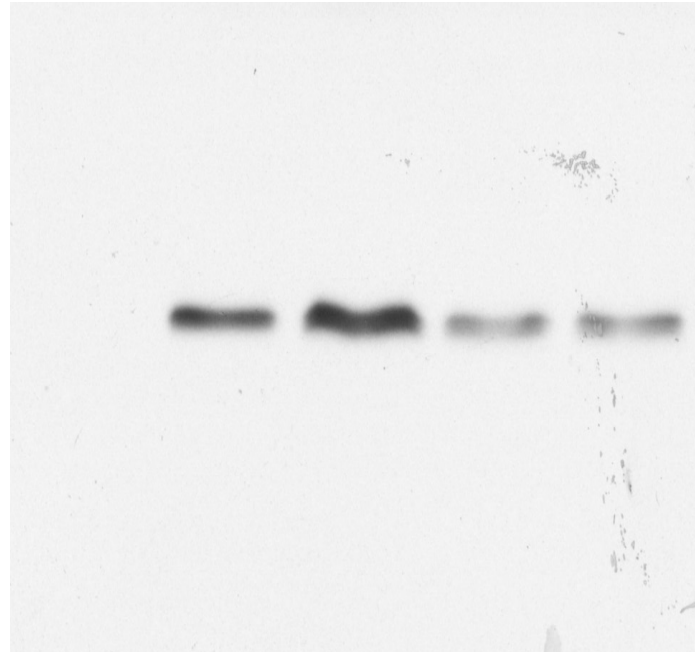

|                                    |   |   |   |   |
|------------------------------------|---|---|---|---|
| <b>Hypoxia</b>                     | - | + | + | + |
| <b>2-ME2</b>                       | - | - | + | - |
| <b>LV-HIF-1<math>\alpha</math></b> | - | - | - | + |
| <b>-shRNA</b>                      |   |   |   |   |
| <b>LV-control</b>                  | + | - | - | - |
| <b>-shRNA</b>                      |   |   |   |   |

**Figure 3C**

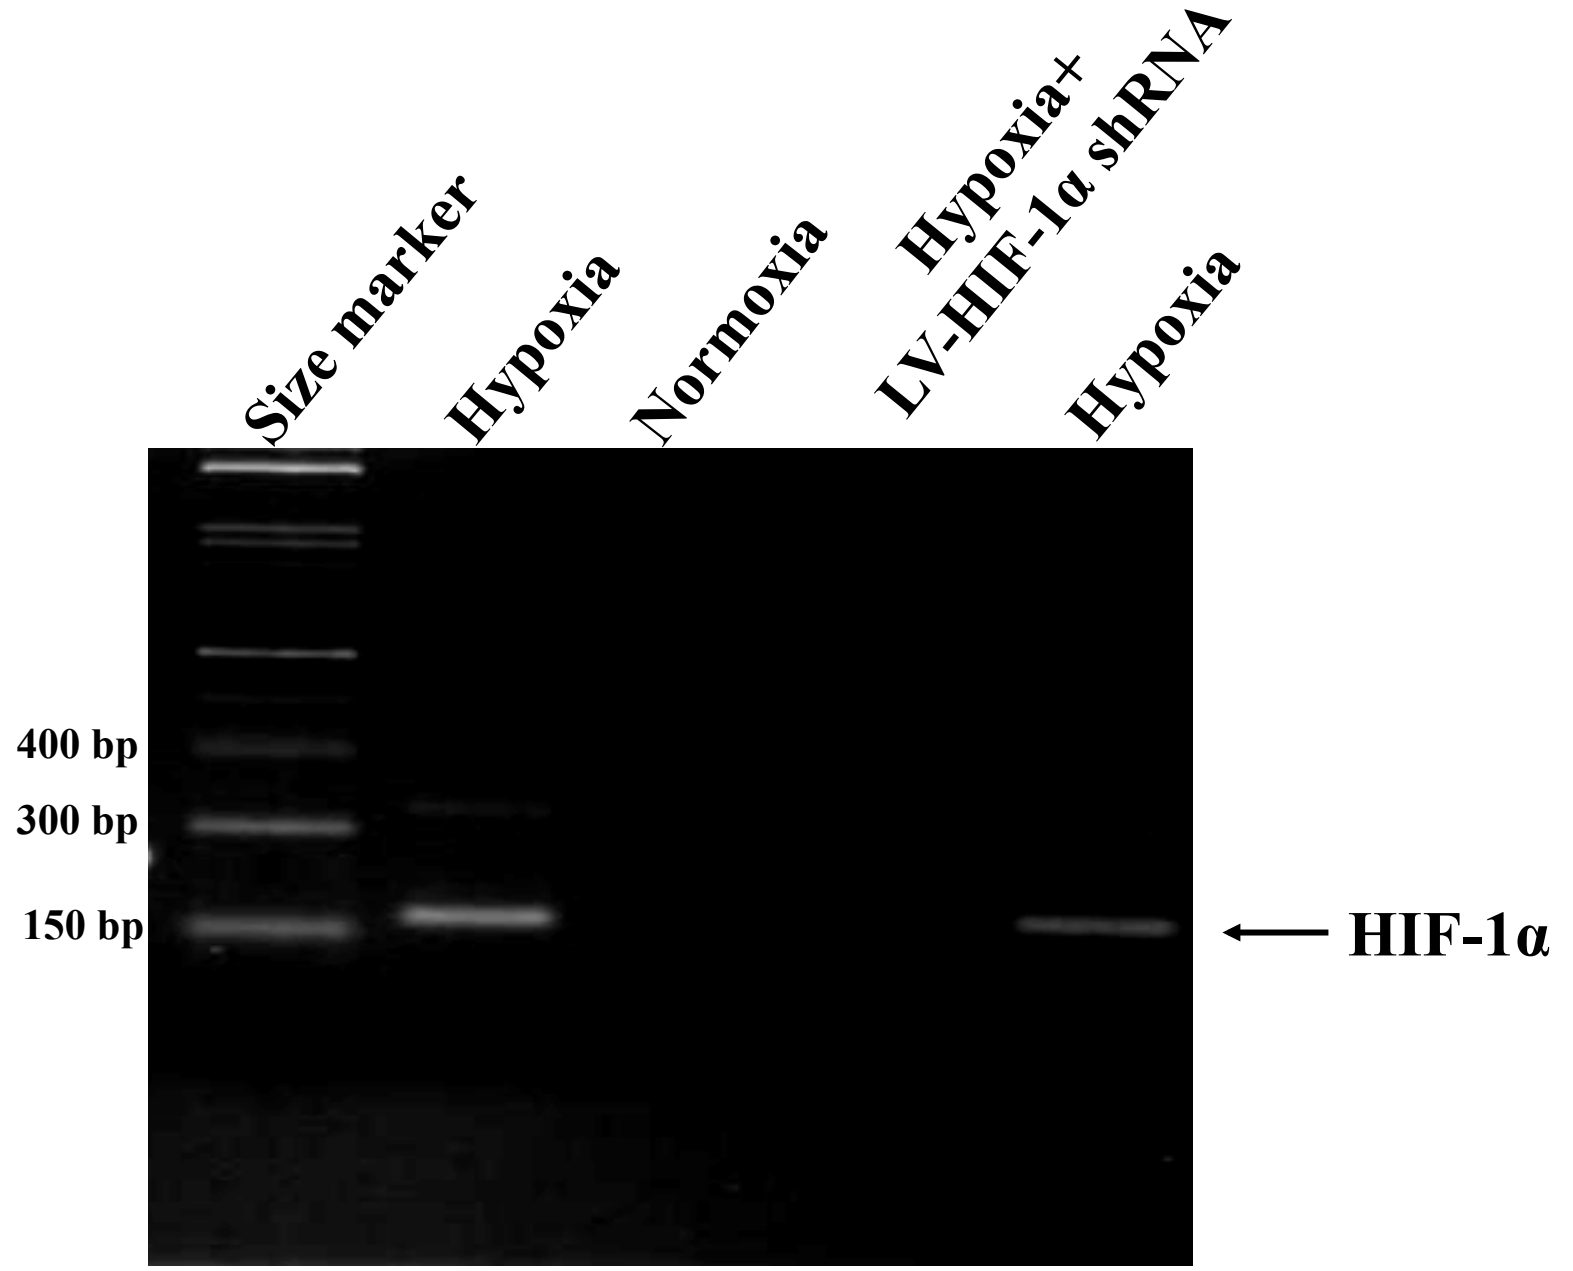

**Figure 3E**

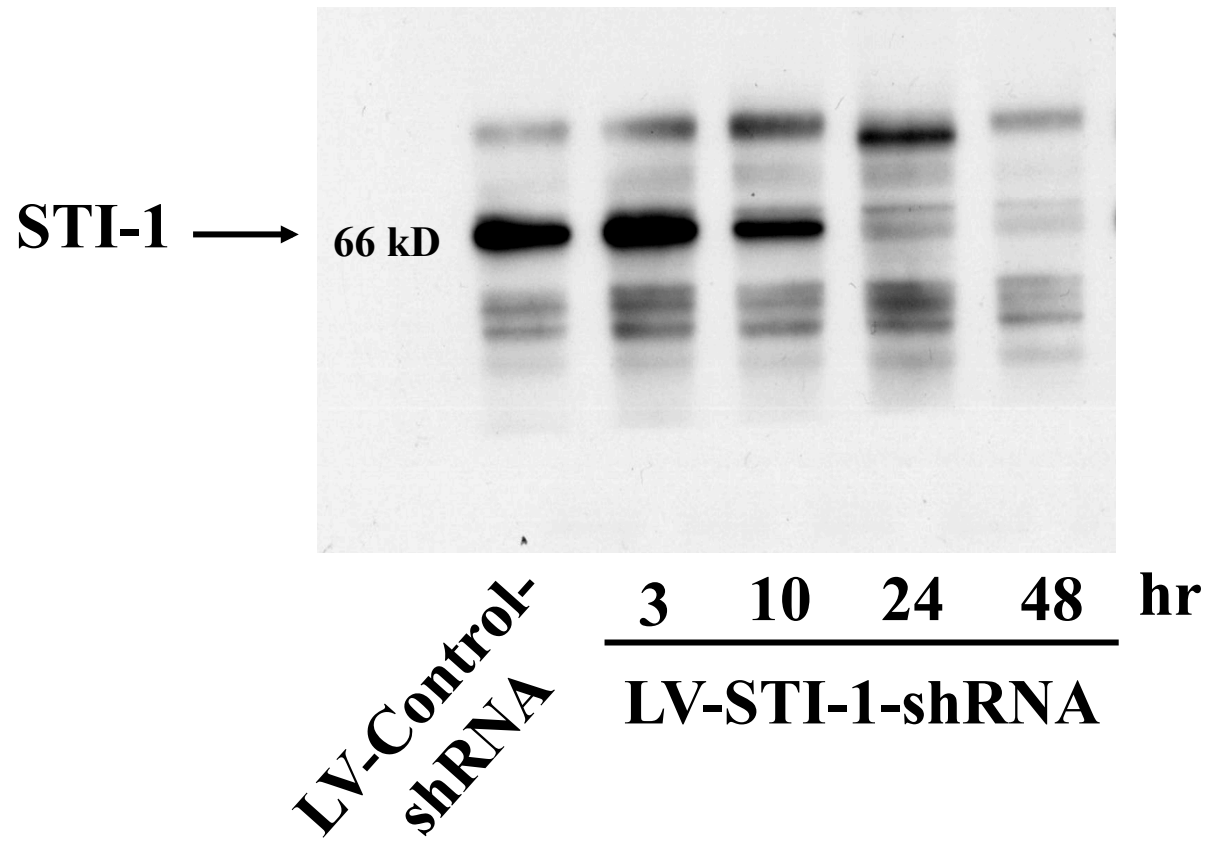

**Figure 7B**
